# Supplementary material
Source: Springer Nature journal article supplement (https://www.springermedizin.de/resource/supplementary/12885_2010_2205_MOESM2_ESM.pdf/9460758)

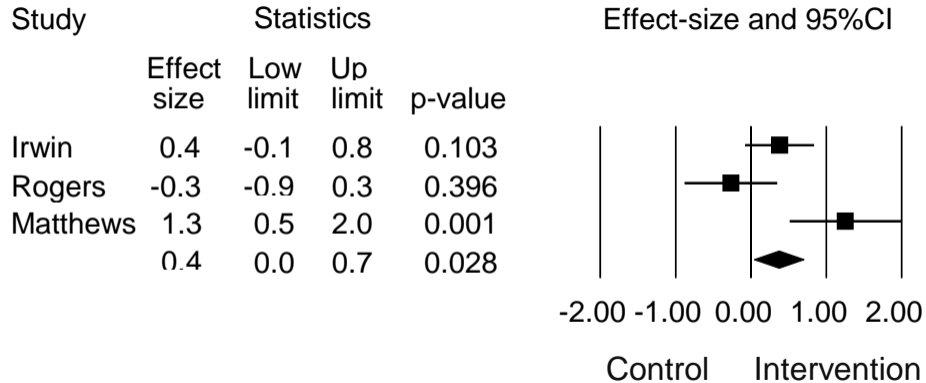

Supplement: MOESM2 [file 9460758]
